# Supplementary material for: Performance of BioFire array or QuickVue influenza A + B test versus a validation qPCR assay for detection of influenza A during a volunteer A/California/2009/H1N1 challenge study
Source: Springer Nature journal article supplement (doi:10.1186/s12985-021-01516-0), 2021-02-25

Figure S1

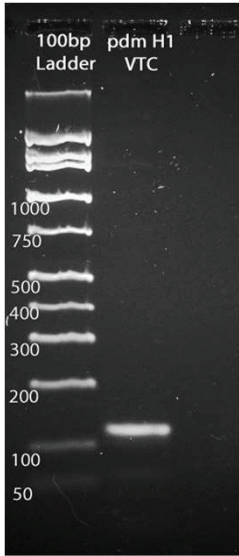

Supplement: MOESM3 [file 18903868]
